# Supplementary material
Source: PubMed Central journal article supplement (PMC3144142)

# Supplementary Figure S1

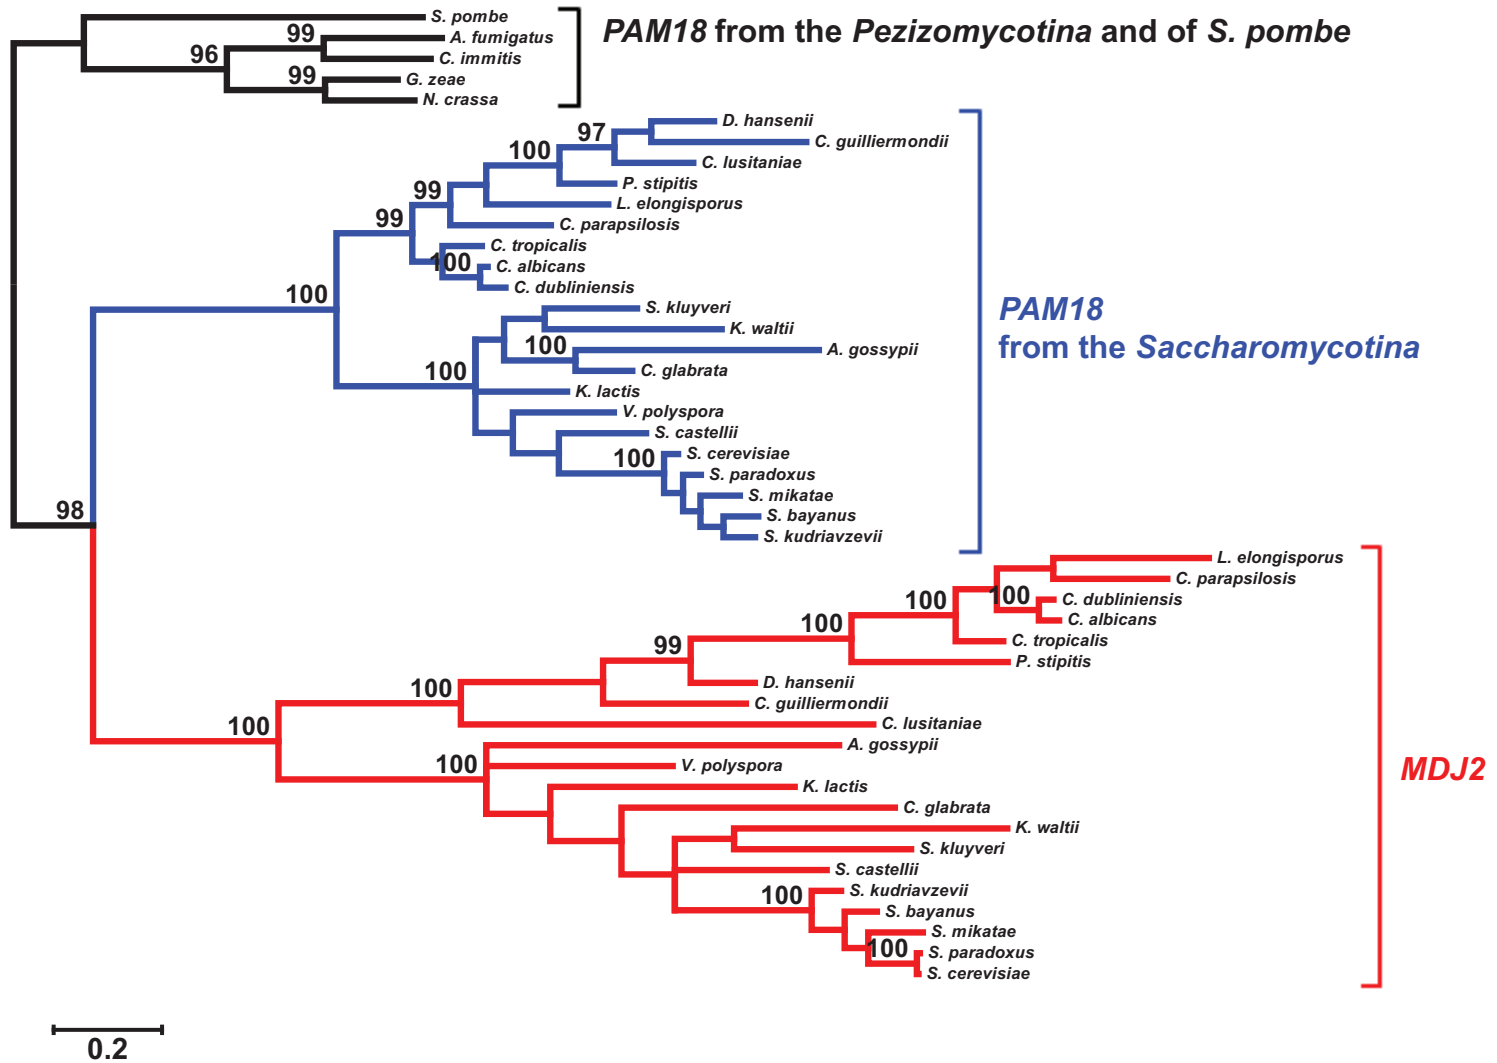

Supplement: supp_msr019_Suppl_Fig_S1_S2.pdf [file supp_msr019_Suppl_Fig_S1_S2.pdf]
